# Supplementary material for: FarGen: Elucidating the distribution of coding variants in the isolated population of the Faroe Islands
Source: Research Square preprint supplement (doi:10.21203/rs.3.rs-1744790/v1), 2022-06-17
Supplement: Supplementary file 1 [file b405d187dd4621d1745e77f3.xlsx]

## Sheet: Table_pathogenic_clinvar_varian
		Table 1. The 19 pathogenic or likely pathogenic variants identified in the FarGen dataset. The table includes the associated gene (abbreviates), genomic position (hg38), RSID
		from dbSNP, nucleotide change, protein change, molecular consequence, and minor allele frequency (MAF) in FarGen, total gnomAD population (gnomAD), and the non-Finnish
		north-western European population in gnomAD (gnomAD NWE). We used the ClinVar classification of pathogenicity and allele frequencies from gnomAD v2.1.1 exome sites data.
								Minor allele frequency
		Gene	Genomic pos.	dbSNP	Nucleotide	Protein	Molecular consequence	FarGen	gnomAD	gnomAD NWE
		MCCC1	chr3:183037285	rs727504002	c.1526delG	p.Cys509fs	Frameshift	0.024	1.0E-05	0
		SUCLA2	chr13:47988540	rs113994161	c.534+1G>A	-	Splice donor	0.034	1.0E-05	0
		CD46	chr1:207761338	rs202071781	c.565T>G	p.Tyr189Asp	Missense	0.003	2.0E-06	0
		SLC22A5	chr5:132370067	rs72552725	c.95A>G	p.Asn32Ser	Missense	0.045	2.0E-06	0
		RASGRP2	chr11:64730127	rs774996406	c.1479dupG	p.Arg494fs	Frameshift	0.129	4.0E-06	2.7E-05
		LRPPRC	chr2:43918025	rs769022521	c.3146_3147delAA	p.Lys1049fs	Frameshift	0.019	4.0E-06	4.8E-05
		COL1A1	chr17:50188631	rs72653177	c.3106C>T	p.Arg1036Cys	Missense	0.021	6.0E-06	0
		FANCE	chr6:35457937	rs749898067	c.929dupC	p.Val311fs	Frameshift	0.051	9.0E-06	2.0E-04
		SPG7	chr16:89531962	rs760818649	c.1053dupC	p.Gly352fs	Frameshift	0.053	1.3E-04	4.0E-04
		EXOSC3	chr9:37783993	rs141138948	c.395A>C	p.Asp132Ala	Missense	0.002	4.1E-04	9.0E-04
		C6	chr5:41149933	rs76202909	c.2381+2T>C	-	Splice donor	0.005	0.002	0.004
		ACSF3	chr16:89154148	rs141090143	c.1672C>T	p.Arg558Trp	Missense	0.018	0.003	0.006
		KIAA0586	chr14:58432438	rs534542684	c.428delG	p.Arg143fs	Frameshift	0.004	0.003	0.004
		PADI3	chr1:17270928	rs144080386	c.881C>T	p.Ala294Val	Missense	0.004	0.007	0.009
		CFTR	chr7:117559590	rs1801178	c.1521_1523del	p.Phe508del	Missense	0.028	0.007	0.016
		BCHE	chr3:165830741	rs1799807	c.293A>G	p.Asp98Gly	Missense	0.034	0.012	0.020
		MBL2	chr10:52771482	rs5030737	c.154C>T	p.Arg52Cys	Missense	0.054	0.056	0.071
		IL4R	chr16:27344882	rs1805010	c.223A>G	p.Ile75Val	Missense	0.379	0.448	0.458
		MAD1L1	chr7:2225526	rs121908982	c.175C>T	p.Arg59Cys	Missense	0.004	0.003	0.006
